# Supplementary material for: Association of Antiretroviral Therapy with Platelet Function and Systemic Inflammatory Response in People Living with HIV: A Cross-Sectional Study
Source: MDPI journal article supplement (doi:10.3390/microorganisms11040958), 2023-04-06
Supplement: s1 [file s1]

**Table S1.** Platelet activation assays.

|                                                   | TDF    | TAF    | ABC     | Statistical Significance<br>( <i>p</i> ) |
|---------------------------------------------------|--------|--------|---------|------------------------------------------|
| <b>Prior to ADP activation</b>                    |        |        |         |                                          |
| CD62P                                             | 3.318  | 3.008  | 3.792   | 0.765                                    |
| PAC-1                                             | 3.624  | 3.680  | 6.858   | 0.174                                    |
| <b>Following ADP activation</b>                   |        |        |         |                                          |
| CD62P                                             | 103.30 | 105.00 | 165.833 | 0.326                                    |
| PAC-1                                             | 30.460 | 28.586 | 33.650  | 0.930                                    |
| Values express median fluorescent intensity (MFI) |        |        |         |                                          |
